# Supplementary material for: Mitogen-Activated Protein Kinase Cascades in Plant Hormone Signaling
Source: PubMed Central journal article supplement (PMC6187979; doi:10.3389/fpls.2018.01387), 2018-10-08
Supplement: Table_1.pdf [file Table_1.pdf]

**Supplemental Table 1.** Nomenclature of plant MAPKKs divided by various groups based on sequence homology with *Arabidopsis* MAPKKs

| Group                                   | Gene name | ID / GenBank Acc No. | Polypeptide length (aa) | Other names                   | References                                                |
|-----------------------------------------|-----------|----------------------|-------------------------|-------------------------------|-----------------------------------------------------------|
| <b><i>Arabidopsis thaliana</i></b>      |           |                      |                         |                               |                                                           |
| A                                       | AtMKK1    | At4g26070            | 354                     | AtMEK1                        | Hadiarto et al., 2006                                     |
|                                         | AtMKK2    | At4g29810            | 363                     |                               | Teige et al., 2004                                        |
|                                         | AtMKK6    | At5g56580            | 356                     | AtANQ1                        | Kosetsu et al. 2010                                       |
| B                                       | AtMKK3    | At5g40440            | 520                     |                               | Lee et al., 2008a                                         |
| C                                       | AtMKK4    | At1g51660            | 366                     |                               | Le et al., 2014; Lau and Bergmann 2012; Kim et al., 2012a |
|                                         | AtMKK5    | At3g21220            | 348                     | AtMEK5, AtMAP2Kalpha          | Liu et al., 2008; Huang et al. 2000                       |
| D                                       | AtMKK7    | At1g18350            | 307                     | AtBUD1                        | Dai et al., 2006                                          |
|                                         | AtMKK8    | At3g06230            | 293                     |                               |                                                           |
|                                         | AtMKK9    | At1g73500            | 310                     |                               | Lee et al., 2008a                                         |
|                                         | AtMKK10   | At1g32320            | 305                     |                               | Lee et al., 2008a                                         |
| <b><i>Brassica napus</i></b>            |           |                      |                         |                               |                                                           |
| A                                       | BnaMKK1   | JQ708028             | 355                     |                               | Liang et al. 2013                                         |
|                                         | BnaMKK2   | JQ708029             | 364                     |                               | Liang et al. 2013                                         |
|                                         | BnaMKK6   | JQ708032             | 356                     |                               | Liang et al. 2013                                         |
| B                                       | BnaMKK3   | JQ708030             | 518                     |                               | Liang et al. 2013                                         |
| C                                       | BnaMKK4   | JQ708031             | 356                     |                               | Liang et al. 2013                                         |
|                                         | BnaMKK5   | KC246595             | 332                     |                               | Liang et al. 2013                                         |
| D                                       | BnaMKK9   | JQ708033             | 306                     |                               | Liang et al. 2013                                         |
| <b><i>Chlamydomonas reinhardtii</i></b> |           |                      |                         |                               |                                                           |
| A                                       | CreinMKK6 | XP_001693665         | 249                     |                               |                                                           |
| B                                       | CreinMKK3 | XP_001696437         | 452                     |                               |                                                           |
| <b><i>Medicago sativa</i></b>           |           |                      |                         |                               |                                                           |
| A                                       | MsMKK2    | AJ293275             | 356                     | MsPRKK                        | Cardinale et al., 2002                                    |
| C                                       | MsMKK4    | AJ293274             | 368                     | MsSIMKK                       | Cardinale et al., 2002                                    |
| <b><i>Nicotiana tabacum</i></b>         |           |                      |                         |                               |                                                           |
| A                                       | NtMKK2    | AF165186             | 357                     | NtSIPKK                       | Gomi et al., 2005                                         |
|                                         | NtMKK6    | AJ302651             | 354                     | NtMEK1, NtNQK1                | Soyano et al., 2003                                       |
| B                                       | NtMKK3    | D31964               | 518                     | NtNPK2                        | Gomi et al., 2005                                         |
| C                                       | NtMKK4    | AF325168             | 372                     | NtMEK2                        | Gomi et al., 2005                                         |
| <b><i>Oryza sativa</i></b>              |           |                      |                         |                               |                                                           |
| A                                       | OsMKK1    | Os06g05520           | 352                     | OsMEK2                        | Singh et al., 2012                                        |
|                                         | OsMKK6    | Os01g32660           | 355                     | OsMEK1                        | Singh et al., 2012                                        |
| B                                       | OsMKK3    | Os06g27890           | 320                     | OsMEK8a, OsMEK8b <sup>9</sup> | Singh et al., 2012                                        |
| C                                       | OsMKK4    | Os02g54600           | 369                     | OsMEK6                        | Singh et al., 2012                                        |
|                                         | OsMKK5    | Os06g09180           | 342                     | OsMEK7a, OsMEK7b              | Singh et al., 2012                                        |
| D                                       | OsMKK10-1 | Os02g46760           | 340                     | OsMEK4                        | Singh et al., 2012                                        |
|                                         | OsMKK10-2 | Os03g12390           | 339                     | OsMEK3                        | Singh et al., 2012                                        |
|                                         | OsMKK10-3 | Os03g50550           | 345                     |                               |                                                           |

| <i>Selaginella moellendorffii</i> |           |                   |     |                |                                          |
|-----------------------------------|-----------|-------------------|-----|----------------|------------------------------------------|
| A                                 | SmMKK6    | 272204            | 346 |                |                                          |
| B                                 | SmMKK3-1  | 74697             | 509 |                |                                          |
|                                   | SmMKK3-2  | 168690            | 509 |                |                                          |
| D                                 | SmMKK7-1  | 90224             | 333 |                |                                          |
|                                   | SmMKK7-2  | 186197            | 353 |                |                                          |
| <i>Solanum lycopersicum</i>       |           |                   |     |                |                                          |
| A                                 | SIMKK2    | Solyc12g009020    | 357 | LeMEK1, SIMKK1 | Cardinale et al., 2002; Li et al., 2014a |
|                                   | SIMKK6    | Solyc03g119490    | 354 | SIMKK3         | Li et al., 2014a                         |
| B                                 | SIMKK3    | Solyc03g019850    | 515 | SIMKK5         | Li et al., 2014a                         |
| C                                 | SIMKK4    | Solyc03g123800    | 359 | SIMKK2         | Li et al., 2014a                         |
| D                                 | SIMKK9    | Solyc03g097920    | 335 | SIMKK4         | Li et al., 2014a                         |
| <i>Volvox carteri</i>             |           |                   |     |                |                                          |
| A                                 | VcMKK6    | 73333             | 415 |                |                                          |
| B                                 | VcMKK3    | 99491             | 327 |                |                                          |
| <i>Zea Mays</i>                   |           |                   |     |                |                                          |
| A                                 | ZmMKK1    | GRMZM2G400470_T03 | 350 |                |                                          |
|                                   | ZmMKK6    | GRMZM2G167856_T01 | 355 | ZmMEK1         | Kong et al., 2013                        |
| B                                 | ZmMKK3-1  | JN972438          | 523 | ZmMKK3         | Kong et al., 2013                        |
|                                   | ZmMKK3-2  | GRMZM2G004468_T05 | 561 |                |                                          |
|                                   | ZmMKK3-3  | GRMZM2G367411_T01 | 299 |                |                                          |
| C                                 | ZmMKK4    | GU942956          | 357 |                |                                          |
|                                   | ZmMKK5    | GRMZM5G834697_T01 | 347 | ZmMAPKK1       | Kong et al., 2013                        |
| D                                 | ZmMKK10-1 | GRMZM2G130213_T01 | 375 |                |                                          |
|                                   | ZmMKK10-2 | GRMZM2G344388_T01 | 401 |                |                                          |
