# Supplementary material for: Mitogen-Activated Protein Kinase Cascades in Plant Hormone Signaling
Source: PubMed Central journal article supplement (PMC6187979; doi:10.3389/fpls.2018.01387), 2018-10-08
Supplement: Table_2.pdf [file Table_2.pdf]

**Supplemental Table 2** Nomenclature of plant MAPKs divided on groups based on sequence homology with *Arabidopsis* MAPKs

| Motif                                   | Group        | Gene name    | ID / GenBank Acc No. | Polypeptide length (aa)                                  | Other names | References                                                                          |
|-----------------------------------------|--------------|--------------|----------------------|----------------------------------------------------------|-------------|-------------------------------------------------------------------------------------|
| <b><i>Arabidopsis thaliana</i></b>      |              |              |                      |                                                          |             |                                                                                     |
| T-E-Y                                   | MAPK group A | AtMPK3       | At3g45640            | 370                                                      |             | Droillard et al., 2002                                                              |
|                                         |              | AtMPK6       | At2g43790            | 395                                                      |             | Droillard et al., 2002                                                              |
|                                         |              | AtMPK10      | At3g59790            | 393                                                      |             | Lee et al., 2008a                                                                   |
|                                         | MAPK group B | AtMPK4       | At4g01370            | 376                                                      |             | Teige et al., 2004; Kong et al., 2012; Rodriguez et al., 2010; Kosetsu et al., 2010 |
|                                         |              | AtMPK5       | At4g11330            | 376                                                      |             | Teige et al., 2004; Lee et al., 2008a                                               |
|                                         |              | AtMPK11      | At1g01560            | 369                                                      |             | Lee et al., 2008a                                                                   |
|                                         |              | AtMPK12      | At2g46070            | 372                                                      |             | Meszaros et al., 2006; Lee et al., 2009                                             |
|                                         | MAPK group C | AtMPK13      | At1g07880            | 363                                                      |             | Teige et al., 2004; Lee et al., 2008a                                               |
|                                         |              | AtMPK1       | At1g10210            | 370                                                      |             | Lee et al., 2008a; Doczi et al., 2012                                               |
|                                         |              | AtMPK2       | At1g59580            | 376                                                      |             | Lee et al., 2008a; Doczi et al., 2012                                               |
|                                         |              | AtMPK7       | At2g18170            | 368                                                      |             | Lee et al., 2008a; Doczi et al., 2012                                               |
|                                         |              | AtMPK14      | At4g36450            | 361                                                      |             | Lee et al., 2008a; Doczi et al., 2012                                               |
|                                         | T-D-Y        | MAPK group D | AtMPK8               | At1g18150                                                | 589         |                                                                                     |
| AtMPK9                                  |              |              | At3g18040            | 510                                                      |             | Doczi et al., 2012                                                                  |
| AtMPK15                                 |              |              | At1g73670            | 576                                                      |             | Doczi et al., 2012                                                                  |
| AtMPK16                                 |              |              | At5g19010            | 567                                                      |             | Doczi et al., 2012                                                                  |
| AtMPK17                                 |              |              | At2g01450            | 486                                                      |             | Lee et al., 2008a                                                                   |
| AtMPK18                                 |              |              | At1g53510            | 615                                                      |             | Wang et al., 2011; Doczi et al., 2012                                               |
| AtMPK19                                 |              |              | At3g14720            | 598                                                      |             | Doczi et al., 2012                                                                  |
| AtMPK20                                 | At2g42880    | 606          |                      | Wang et al., 2011; Doczi et al., 2012; Lee et al., 2008a |             |                                                                                     |
| <b><i>Brassica napus</i></b>            |              |              |                      |                                                          |             |                                                                                     |
| T-E-Y                                   | MAPK group A | BnaMPK3      | JQ708040             | 370                                                      |             | Liang et al. 2013                                                                   |
|                                         |              | BnaMPK6      | JQ708043             | 395                                                      |             | Liang et al. 2013                                                                   |
|                                         | MAPK group B | BnaMPK4      | JQ708041             | 373                                                      |             | Liang et al. 2013                                                                   |
|                                         |              | BnaMPK5      | JQ708042             | 373                                                      |             | Liang et al. 2013                                                                   |
|                                         | MAPK group C | BnaMPK1      | JQ708034             | 369                                                      |             | Liang et al. 2013                                                                   |
|                                         |              | BnaMPK2      | JQ708038             | 370                                                      |             | Liang et al. 2013                                                                   |
| T-D-Y                                   | MAPK group D | BnaMPK8      | JQ708044             | 581                                                      |             | Liang et al. 2013                                                                   |
|                                         |              | BnaMPK9      | JQ708045             | 501                                                      |             | Liang et al. 2013                                                                   |
|                                         |              | BnaMPK16     | JQ708035             | 558                                                      |             | Liang et al. 2013                                                                   |
|                                         |              | BnaMPK17     | JQ708036             | 487                                                      |             | Liang et al. 2013                                                                   |
|                                         |              | BnaMPK19     | JQ708037             | 599                                                      |             | Liang et al. 2013                                                                   |
|                                         |              | BnaMPK20     | JQ708039             | 611                                                      |             | Liang et al. 2013                                                                   |
| <b><i>Chlamydomonas reinhardtii</i></b> |              |              |                      |                                                          |             |                                                                                     |
| T-E-Y                                   | MAPK group C | CreinMPK4-1  | Cre01.g010000.t1.2   | 389                                                      |             | Mohanta et al., 2015                                                                |
|                                         |              | CreinMPK4-2  | Cre12.g508900.t1.2   | 375                                                      |             | Mohanta et al., 2015                                                                |
|                                         |              | CreinMPK4-3  | Cre12.g509000.t1.3   | 353                                                      |             | Mohanta et al., 2015                                                                |
| T-D-Y                                   | MAPK group D | CreinMPK15   | Cre08.g385050.t1.3   | 740                                                      |             | Mohanta et al., 2015                                                                |

|                                          |              |                   |                    |     |                        |                                                                    |
|------------------------------------------|--------------|-------------------|--------------------|-----|------------------------|--------------------------------------------------------------------|
|                                          |              | <b>CreinMPK18</b> | g18025.t1          | 765 |                        | Mohanta et al., 2015                                               |
|                                          | MAPK group E | <b>CreinMPK7</b>  | Cre13.g607300.t1.2 | 433 |                        | Mohanta et al., 2015                                               |
| <b><i>Coccomyxa subellipsoidea</i></b>   |              |                   |                    |     |                        |                                                                    |
| <b>T-E-Y</b>                             | MAPK group C | <b>CsubMPK4</b>   | 11831              | 377 |                        | Mohanta et al., 2015                                               |
| <b>T-D-Y</b>                             | MAPK group D | <b>CsubMPK15</b>  | 54284              | 537 |                        | Mohanta et al., 2015                                               |
| <b>T-R-M</b>                             | MAPK group E | <b>CsubMPK3</b>   | 14112              | 359 |                        | Mohanta et al., 2015                                               |
| <b>T-D-Y</b>                             |              | <b>CsubMPK7</b>   | 47764              | 391 |                        | Mohanta et al., 2015                                               |
| <b><i>Medicago sativa</i></b>            |              |                   |                    |     |                        |                                                                    |
| <b>T-E-Y</b>                             | MAPK group A | <b>MsMPK3</b>     | X82270             | 371 | MsSAMK, MsMMK4         | Cardinale et al., 2002; Daxberger et al., 2007                     |
|                                          |              | <b>MsMPK6</b>     | X66469             | 387 | MsSIMK, MsK7, MsMMK1   | Cardinale et al., 2002; Jonak et al., 1993; Daxberger et al., 2007 |
|                                          | MAPK group B | <b>MsMPK4</b>     | X82268             | 371 | MsMMK2                 | Cardinale et al., 2002                                             |
|                                          |              | <b>MsMPK13</b>    | AJ224336           | 374 | MsMMK3                 | Cardinale et al., 2002                                             |
| <b>T-D-Y</b>                             | MAPK group D | <b>MsMPK19</b>    | AF129087           | 608 | MSTDY1                 | MAPK Group 2002                                                    |
| <b><i>Micromonas pusila</i> CCMP1545</b> |              |                   |                    |     |                        |                                                                    |
| <b>T-E-Y</b>                             | MAPK group C | <b>MpMPK2</b>     | 203785             | 374 |                        | Mohanta et al., 2015                                               |
|                                          |              | <b>MpMPK4</b>     | 27380              | 426 |                        | Mohanta et al., 2015                                               |
| <b>T-D-Y</b>                             | MAPK group D | <b>MpMPK15</b>    | 44271              | 362 |                        | Mohanta et al., 2015                                               |
|                                          | MAPK group E | <b>MpMPK13</b>    | 14294              | 380 |                        | Mohanta et al., 2015                                               |
| <b><i>Nicotiana tabacum</i></b>          |              |                   |                    |     |                        |                                                                    |
| <b>T-E-Y</b>                             | MAPK group A | <b>NtMPK3</b>     | AB052964           | 375 | NtWIPK, NtMPK5         | MAPK Group 2002; Zhang et al., 2013                                |
|                                          |              | <b>NtMPK6-1</b>   | AF165186           | 357 | NtSIPK, NtMPK6         | MAPK Group 2002; Zhang et al., 2013                                |
|                                          |              | <b>NtMPK6-2</b>   | X83880             | 393 | NtNTF4, NtMPK7         | MAPK Group 2002; Zhang et al., 2013                                |
| <b>M-E-Y</b>                             | MAPK group B | <b>NtMPK4-1</b>   | AB212070           | 373 | NtMPK4, NtMPK1         | Gomi et al., 2005; Zhang et al., 2013                              |
|                                          |              | <b>NtMPK4-2</b>   | JX076820           | 374 | NtMPK2                 | Zhang et al., 2013                                                 |
|                                          |              | <b>NtMPK4-3</b>   | JX076821           | 380 | NtMPK3                 | Zhang et al., 2013                                                 |
| <b>T-E-Y</b>                             | MAPK group C | <b>NtMPK13</b>    | AB055515           | 371 | NtNRK1, NtNTF6, NtMPK4 | MAPK Group 2002; Zhang et al., 2013                                |
|                                          |              | <b>NtMPK1</b>     | X69971             | 372 | NtMPK14, NtNTF3        | Berberich et al., 1999; MAPK Group 2002                            |
|                                          |              | <b>NtMPK7</b>     | JX076817           | 370 | NtMPK15                | Zhang et al., 2013                                                 |
| <b>T-D-Y</b>                             | MAPK group D | <b>NtMPK9-1</b>   | JX076815           | 594 | NtMPK12                | Zhang et al., 2013                                                 |
|                                          |              | <b>NtMPK9-2</b>   | JX076816           | 590 | NtMPK13                | Zhang et al., 2013                                                 |
|                                          |              | <b>NtMPK15</b>    | JX076814           | 509 | NtMPK11                | Zhang et al., 2013                                                 |
|                                          |              | <b>NtMPK16</b>    | JX076813           | 566 | NtMPK10                | Zhang et al., 2013                                                 |
|                                          |              | <b>NtMPK18</b>    | JX076823           | 373 | NtMPK9                 | Zhang et al., 2013                                                 |
|                                          |              | <b>NtMPK20</b>    | JX076822           | 610 | NtMPK8                 | Zhang et al., 2013                                                 |
| <b>T-E-Y</b>                             | MAPK group E | <b>NtMPK22-1</b>  | JX076818           | 425 | NtMPK16                | Zhang et al., 2013                                                 |
|                                          |              | <b>NtMPK22-2</b>  | JX076819           | 470 | NtMPK17                | Zhang et al., 2013                                                 |
| <b><i>Ostreococcus lucimarinus</i></b>   |              |                   |                    |     |                        |                                                                    |
| <b>T-E-Y</b>                             | MAPK group C | <b>OIMPK6</b>     | C_Ch_9000126       | 405 |                        | Mohanta et al., 2015                                               |
| <b>T-S-Y</b>                             |              | <b>OIMPK7</b>     | e_gwEuk.9.247      | 449 |                        | Mohanta et al., 2015                                               |
| <b>T-D-Y</b>                             | MAPK group D | <b>OIMPK9</b>     | gwEuk.8.109.1      | 387 |                        | Mohanta et al., 2015                                               |
| <b><i>Oryza sativa</i></b>               |              |                   |                    |     |                        |                                                                    |

|                                          |                  |                  |                  |         |                                                                |                                                                                                                |
|------------------------------------------|------------------|------------------|------------------|---------|----------------------------------------------------------------|----------------------------------------------------------------------------------------------------------------|
| <b>T-E-Y</b>                             | MAPK group A     | <b>OsMPK3</b>    | Os03g17700       | 369     | OsMPK5, OsMAP1,<br>OsMAPK2, OsMSRMK2,<br>OsBIMK1               | Reyna and Yang, 2006; Wen et al.,<br>2002; Huang et al., 2002; Agrawal et<br>al., 2002; Song and Goodman, 2002 |
|                                          |                  | <b>OsMPK6</b>    | Os06g06090       | 398     | OsMPK1, OsMAPK6, OsSIPK                                        | Reyna and Yang, 2006; Lieberherr et<br>al., 2005; Lee et al., 2008b                                            |
| <b>M-E-Y</b>                             | MAPK group B     | <b>OsMPK4-1</b>  | Os10g38950       | 376     | OsMPK6                                                         | Reyna and Yang, 2006                                                                                           |
|                                          |                  | <b>OsMPK4-2</b>  | Os08g06060       | 394     | OsMPK2                                                         | Reyna and Yang, 2006                                                                                           |
| <b>T-E-Y</b>                             | MAPK group C     | <b>OsMPK7</b>    | Os06g48590       | 369     | OsMPK4, OsMAPK4,<br>OsMAPkinase2, OsMSRMK3,<br>OsBIMK1, OsMPK3 | Reyna and Yang, 2006; Jonak et al.,<br>1993; Song and Goodman, 2002;<br>Hamel et al., 2006                     |
|                                          |                  | <b>OsMPK14</b>   | Os02g05480       | 370     | OsMPK3, OsMAPK3,<br>OsMAP3                                     | Reyna and Yang, 2006; Jonak et al.,<br>1993; Cardinale et al., 2002                                            |
| <b>T-D-Y</b>                             | MAPK group D     | <b>OsMPK16-1</b> | Os11g17080       | 498     | OsMPK15                                                        | Reyna and Yang, 2006                                                                                           |
|                                          |                  | <b>OsMPK16-2</b> | Os05g05160       | 542     | OsMPK14                                                        | Reyna and Yang, 2006                                                                                           |
|                                          |                  | <b>OsMPK17-1</b> | Os06g49430       | 580     | OsMPK12, OsBWMK1                                               | Reyna and Yang, 2006; Cheong et al.,<br>2003                                                                   |
|                                          |                  | <b>OsMPK17-2</b> | Os02g04230       | 506     | OsMPK13, OsBIMK2,<br>OsRMAPK2                                  | Reyna and Yang, 2006; Song et al.,<br>2006; Hamel et al., 2006                                                 |
|                                          |                  | <b>OsMPK20-1</b> | Os01g43910       | 611     | OsMPK9, OsMPK10                                                | Reyna and Yang, 2006                                                                                           |
| -                                        | MAPK group D     | <b>OsMPK20-2</b> | Os05g50560       | 349     |                                                                |                                                                                                                |
| <b>T-D-Y</b>                             |                  | <b>OsMPK20-3</b> | Os06g26340       | 570     | OsMPK11                                                        | Reyna and Yang, 2006                                                                                           |
|                                          |                  | <b>OsMPK20-4</b> | Os01g47530       | 569     | OsMPK8, OsWJUMK1,<br>OsMPKG1                                   | Reyna and Yang, 2006; Hamel et al.,<br>2006                                                                    |
|                                          | <b>OsMPK20-5</b> | Os05g49140       | 592              | OsMPK7  | Reyna and Yang, 2006                                           |                                                                                                                |
|                                          | <b>OsMPK21-1</b> | Os05g50120       | 582              | OsMPK17 | Reyna and Yang, 2006                                           |                                                                                                                |
|                                          |                  | <b>OsMPK21-2</b> | Os01g45620       | 501     | OsMPK16, OsMPKG2                                               | Reyna and Yang, 2006; Hamel et al.,<br>2006                                                                    |
| <b><i>Picea abies</i></b>                |                  |                  |                  |         |                                                                |                                                                                                                |
| <b>T-E-Y</b>                             | MAPK group A     | <b>PaMPK6</b>    | MA_10437020g0010 | 469     |                                                                | Mohanta et al., 2015                                                                                           |
|                                          | MAPK group B     | <b>PaMPK4</b>    | MA_10437018g0010 | 423     |                                                                | Mohanta et al., 2015                                                                                           |
| MAPK group C                             |                  | <b>PaMPK11</b>   | MA_10432928g0010 | 290     |                                                                | Mohanta et al., 2015                                                                                           |
|                                          | <b>PaMPK1</b>    | MA_10428223g0010 | 368              |         | Mohanta et al., 2015                                           |                                                                                                                |
|                                          | <b>PaMPK2</b>    | MA_9261976g0010  | 179              |         | Mohanta et al., 2015                                           |                                                                                                                |
|                                          | <b>PaMPK3</b>    | MA_160202g0010   | 179              |         | Mohanta et al., 2015                                           |                                                                                                                |
|                                          | -                | <b>PaMPK7-1</b>  | MA_8212817g0010  | 180     |                                                                | Mohanta et al., 2015                                                                                           |
|                                          |                  | <b>PaMPK20</b>   | MA_8212817g0010  | 180     |                                                                | Mohanta et al., 2015                                                                                           |
|                                          |                  | <b>PaMPK8</b>    | MA_10427605g0010 | 216     |                                                                | Mohanta et al., 2015                                                                                           |
| <b>T-D-Y</b>                             | MAPK group D     | <b>PaMPK16</b>   | MA_91728g0010    | 749     |                                                                | Mohanta et al., 2015                                                                                           |
| <b>T-E-M</b>                             | MAPK group E     | <b>PaMPK5</b>    | MA_42176g0010    | 404     |                                                                | Mohanta et al., 2015                                                                                           |
| <b>T-Q-M</b>                             |                  | <b>PaMPK7-2</b>  | MA_60199g0010    | 145     |                                                                | Mohanta et al., 2015                                                                                           |
|                                          |                  | <b>PaMPK10</b>   | MA_117156g0010   | 364     |                                                                | Mohanta et al., 2015                                                                                           |
| <b>T-E-M</b>                             |                  | <b>PaMPK14</b>   | MA_42176g0010    | 404     |                                                                | Mohanta et al., 2015                                                                                           |
| <b><i>Selaginella moellendorffii</i></b> |                  |                  |                  |         |                                                                |                                                                                                                |
| <b>T-E-Y</b>                             | MAPK group B     | <b>SmMPK4</b>    | 105143           | 374     |                                                                | Mohanta et al., 2015                                                                                           |
|                                          | MAPK group C     | <b>SmMPK1</b>    | 443152           | 374     |                                                                | Mohanta et al., 2015                                                                                           |
|                                          |                  | <b>SmMPK7</b>    | 75282            | 370     |                                                                | Mohanta et al., 2015                                                                                           |

|                                    |              |                  |                  |     |                         |                                                           |
|------------------------------------|--------------|------------------|------------------|-----|-------------------------|-----------------------------------------------------------|
| <b>T-D-Y</b>                       | MAPK group D | <b>SmMPK16-1</b> | 74687            | 474 |                         | Mohanta et al., 2015                                      |
|                                    |              | <b>SmMPK16-2</b> | 97841            | 408 |                         | Mohanta et al., 2015                                      |
|                                    | MAPK group E | <b>SmMPK10</b>   | 82767            | 380 |                         | Mohanta et al., 2015                                      |
| <b><i>Solanum lycopersicum</i></b> |              |                  |                  |     |                         |                                                           |
| <b>T-E-Y</b>                       | MAPK group A | <b>SIMP3</b>     | Solyc06g005170   | 373 | SIMAPK3, LeMPK3         | Kong et al., 2012; Kandoth et al., 2007                   |
|                                    |              | <b>SIMP6-1</b>   | Solyc08g014420   | 394 | SIMAPK2, LeMPK2, SIMPK2 | Kong et al., 2012; Kandoth et al., 2007; Li et al., 2014a |
|                                    |              | <b>SIMP6-2</b>   | Solyc12g019460   | 396 | SIMAPK1, LeMPK1, SIMPK1 | Kong et al., 2012; Kandoth et al., 2007; Li et al., 2014a |
| <b>M-E-Y</b>                       | MAPK group B | <b>SIMP4-1</b>   | Solyc05g049970   | 376 | SIMAPK6                 | Kong et al., 2012                                         |
| <b>T-E-Y</b>                       |              | <b>SIMP4-2</b>   | Solyc01g094960   | 373 | SIMAPK5                 | Kong et al., 2012                                         |
|                                    |              | <b>SIMP5</b>     | Solyc08g081490   | 379 | SIMAPK7                 | Kong et al., 2012                                         |
|                                    |              | <b>SIMP13</b>    | Solyc11g072630   | 372 | SIMAPK4, SIMPK4         | Kong et al., 2012; Li et al., 2014a;                      |
| <b>T-E-Y</b>                       | MAPK group C | <b>SIMP1</b>     | Solyc04g080730   | 372 | SIMAPK9                 | Kong et al., 2012                                         |
|                                    |              | <b>SIMP7</b>     | Solyc02g084870   | 370 | SIMAPK8                 | Kong et al., 2012                                         |
| <b>T-D-Y</b>                       | MAPK group D | <b>SIMP9-1</b>   | Solyc06g068990   | 601 |                         |                                                           |
|                                    |              | <b>SIMP9-2</b>   | Solyc12g040680   | 575 | SIMAPK16                | Kong et al., 2012                                         |
|                                    |              | <b>SIMP15-1</b>  | Solyc04g007710   | 512 | SIMAPK14                | Kong et al., 2012                                         |
|                                    |              | <b>SIMP15-2</b>  | Solyc05g008020   | 513 | SIMAPK15                | Kong et al., 2012                                         |
|                                    |              | <b>SIMP16</b>    | Solyc01g080240   | 565 | SIMAPK13                | Kong et al., 2012                                         |
|                                    |              | <b>SIMP19-1</b>  | Solyc10g007500   | 593 | SIMAPK10                | Kong et al., 2012                                         |
|                                    |              | <b>SIMP19-2</b>  | Solyc07g062080   | 600 | SIMAPK11                | Kong et al., 2012                                         |
|                                    |              | <b>SIMP20</b>    | Solyc07g056350   | 621 | SIMAPK12                | Kong et al., 2012                                         |
| <b><i>Volvox carteri</i></b>       |              |                  |                  |     |                         |                                                           |
| <b>T-E-Y</b>                       | MAPK group C | <b>VcMPK4-1</b>  | Vocar20007163m   | 397 |                         | Mohanta et al., 2015                                      |
|                                    |              | <b>VcMPK4-2</b>  | Vocar20000906m   | 381 |                         | Mohanta et al., 2015                                      |
| <b>T-D-Y</b>                       | MAPK group D | <b>VcMPK9</b>    | Vocar20004345m   | 466 |                         | Mohanta et al., 2015                                      |
|                                    |              | <b>VcMPK20</b>   | Vocar20011355m.g | 644 |                         | Mohanta et al., 2015                                      |
|                                    | MAPK group E | <b>VcMPK5</b>    | Vocar20007415m   | 430 |                         | Mohanta et al., 2015                                      |
| <b><i>Zea mays</i></b>             |              |                  |                  |     |                         |                                                           |
| <b>T-E-Y</b>                       | MAPK group A | <b>ZmMPK3-1</b>  | GRMZM2G053987    | 321 | ZmMPK4; ZmMPK5          | Sun et al., 2015; Berberich et al., 1999                  |
|                                    |              | <b>ZmMPK3-2</b>  | GRMZM2G017792    | 376 | ZmMPK3                  | Sun et al., 2015                                          |
|                                    |              | <b>ZmMPK6-1</b>  | GRMZM2G002100    | 398 | ZmMPK7                  | Sun et al., 2015                                          |
|                                    |              | <b>ZmMPK6-2</b>  | GRMZM2G020216    | 398 | ZmMPK5                  | Sun et al., 2015                                          |
| <b>M-E-Y</b>                       | MAPK group B | <b>ZmMPK4-1</b>  | GRMZM2G127141    | 372 | ZmSIMK, ZmMPK4          | Sun et al., 2015; Liu et al., 2013                        |
|                                    |              | <b>ZmMPK4-2</b>  | GRMZM2G123886    | 391 | ZmMPK1, ZmMPK12         | Sun et al., 2015; Liu et al., 2013                        |
| <b>T-E-Y</b>                       | MAPK group C | <b>ZmMPK7</b>    | GRMZM2G048455    | 369 | ZmMPK8, ZmMPK1          | Sun et al., 2015; Liu et al., 2013                        |
|                                    |              | <b>ZmMPK14</b>   | GRMZM2G062914    | 370 | ZmMPK2                  | Sun et al., 2015                                          |
| <b>T-D-Y</b>                       | MAPK group D | <b>ZmMPK16</b>   | GRMZM2G089484    | 557 | ZmMPK6                  | Sun et al., 2015;                                         |
|                                    |              | <b>ZmMPK17-1</b> | GRMZM2G306028    | 499 | ZmMPK10, ZmMPK17-2      | Sun et al., 2015; Liu et al., 2013                        |
|                                    |              | <b>ZmMPK17-2</b> | GRMZM2G374088    | 491 | ZmMPK17, ZmMPK17-1      | Sun et al., 2015; Liu et al., 2013                        |
|                                    |              | <b>ZmMPK17-3</b> | GRMZM2G135904    | 289 | ZmMPK9                  | Sun et al., 2015                                          |
|                                    |              | <b>ZmMPK20-1</b> | GRMZM2G131334    | 483 | ZmMPK14, ZmMPK20-2      | Sun et al., 2015; Liu et al., 2013                        |
|                                    |              | <b>ZmMPK20-2</b> | GRMZM2G163861    | 602 | ZmMPK13, ZmMPK20-1      | Sun et al., 2015; Liu et al., 2013                        |
|                                    |              | <b>ZmMPK20-4</b> | GRMZM2G122335    | 588 | ZmMPK19, ZmMPK18-1      | Sun et al., 2015; Liu et al., 2013                        |
|                                    |              | <b>ZmMPK20-5</b> | GRMZM2G007848    | 589 | ZmMPK18, ZmMPK18-2      | Sun et al., 2015; Liu et al., 2013                        |

|  |  |                  |               |     |                  |                                    |
|--|--|------------------|---------------|-----|------------------|------------------------------------|
|  |  | <b>ZmMPK20-6</b> | GRMZM2G034052 | 579 | ZmMPK16, ZmMPK19 | Sun et al., 2015; Liu et al., 2013 |
|  |  | <b>ZmMPK21-1</b> | GRMZM2G062761 | 601 | ZmMPK12, ZmMPK15 | Sun et al., 2015; Liu et al., 2013 |
|  |  | <b>ZmMPK21-2</b> | GRMZM2G375975 | 489 | ZmMPK11, ZmMPK8  | Sun et al., 2015; Liu et al., 2013 |
