# Supplementary material for: Mitogen-Activated Protein Kinase Cascades in Plant Hormone Signaling
Source: PubMed Central journal article supplement (PMC6187979; doi:10.3389/fpls.2018.01387), 2018-10-08
Supplement: Table_3.pdf [file Table_3.pdf]

**Supplemental Table 3.** Data on the ABA- regulated gene coding MAP kinase.

|                                                               | Annotation         | ID / GenBank Acc No. | Homologus proteins                                       | Other factors leading to the up- <sup>(U)</sup> and down-regulation <sup>(D)</sup> of MAPK genes                                                                                                                                     | Known MAP kinase interacting partner(s) | References                                            |
|---------------------------------------------------------------|--------------------|----------------------|----------------------------------------------------------|--------------------------------------------------------------------------------------------------------------------------------------------------------------------------------------------------------------------------------------|-----------------------------------------|-------------------------------------------------------|
| <b>UP-REGULATED GENES</b><br><i>Arachis hypogaea</i> (peanut) |                    |                      |                                                          |                                                                                                                                                                                                                                      |                                         |                                                       |
| MAPK<br>(A group)                                             | <b>AhMPK3</b>      | EU182580             | GmMPK1, MsMMK4, CsTIPK, PtMPK3-1, AtMPK3, NtWIPK, LeMPK3 | wounding stress <sup>U</sup> , H <sub>2</sub> O <sub>2</sub> <sup>U</sup> , SA <sup>U</sup> , MeJA <sup>U</sup>                                                                                                                      | -                                       | Kumar et al., 2009                                    |
| <b>Brassica napus (canola)</b>                                |                    |                      |                                                          |                                                                                                                                                                                                                                      |                                         |                                                       |
| MAPKK<br>(A group)                                            | <b>BnaMCK1</b>     | HQ916282             | AtMCK1, OsMCK1                                           | SA <sup>U</sup> , <i>S. sclerotiorum</i> <sup>U</sup> (pathogenic fungus)                                                                                                                                                            | BnaMPK6                                 | Liang et al., 2013, Sun et al., 2014, Yu et al., 2014 |
| MAPK<br>(B group)                                             | <b>BnOIPK</b>      | -                    | AtMPK4                                                   | Chitosan <sup>U</sup> , JA <sup>U</sup> , SA <sup>U</sup>                                                                                                                                                                            | -                                       | Yin et al., 2010                                      |
| <b>Brassica rapa (field mustard)</b>                          |                    |                      |                                                          |                                                                                                                                                                                                                                      |                                         |                                                       |
| MAPK<br>(B group)                                             | <b>BraMAPK5</b>    | Bra035233*           | AtMAPK5                                                  | waterlogging <sup>U</sup> , NaCl <sup>U</sup> , cold <sup>U</sup> and wound <sup>D</sup> stress, 6-BA <sup>U</sup> , BR <sup>U</sup> , NAA <sup>U</sup> , IAA <sup>U</sup>                                                           | -                                       | Lu et al., 2015                                       |
| MAPK<br>(D group)                                             | <b>BraMAPK17-1</b> | Bra026665*           | AtMAPK17                                                 | BR <sup>U</sup> , heat <sup>U</sup> and cold <sup>U</sup> stress,                                                                                                                                                                    | -                                       | Lu et al., 2015                                       |
| MAPK<br>(D group)                                             | <b>BraMAPK17-2</b> | Bra024886*           | AtMAPK17                                                 | heat <sup>U</sup> , NaCl <sup>U</sup> , PEG <sup>U</sup> , waterlogging <sup>U</sup> , wound <sup>U</sup> and cold <sup>D</sup> stress, 6-BA <sup>U</sup> , BR <sup>U</sup> , GA3 <sup>U</sup> , NAA <sup>U</sup> , IAA <sup>U</sup> | -                                       | Lu et al., 2015                                       |
| MAPK<br>(D group)                                             | <b>BraMAPK18-1</b> | Bra038128*           | AtMAPK18                                                 | NaCl <sup>U</sup> , PEG <sup>U</sup> , cold <sup>U</sup> , waterlogging stress <sup>U</sup>                                                                                                                                          | -                                       | Lu et al., 2015                                       |
| MAPK<br>(D group)                                             | <b>BraMAPK19-1</b> | Bra027317*           | AtMAPK19                                                 | NaCl <sup>U</sup> , PEG <sup>U</sup> cold <sup>U</sup> , waterlogging <sup>U</sup> , heat stress <sup>U</sup>                                                                                                                        | -                                       | Lu et al., 2015                                       |
| <b>Capsicum annuum (pepper)</b>                               |                    |                      |                                                          |                                                                                                                                                                                                                                      |                                         |                                                       |
| MAPK<br>(D group)                                             | <b>CaMPK9-1</b>    | CA12g10140           | AtMPK8, AtMPK15, AtMPK9                                  | NaCl <sup>U</sup> , plant pathogenic bacterium ( <i>Ralstonia solanacearum</i> ) <sup>U</sup>                                                                                                                                        | -                                       | Liu et al., 2015                                      |
| MAPK<br>(D group)                                             | <b>CaMPK17-1</b>   | CA05g08630           | AtMPK15                                                  | plant pathogenic bacterium ( <i>Ralstonia solanacearum</i> ) <sup>U</sup>                                                                                                                                                            | -                                       | Liu et al., 2015                                      |
| <b>Chorispora bungeana</b>                                    |                    |                      |                                                          |                                                                                                                                                                                                                                      |                                         |                                                       |

|                                                  |                   |            |                                                                                  |                                                                                                                                                                                                                           |                                                                                               |                                     |
|--------------------------------------------------|-------------------|------------|----------------------------------------------------------------------------------|---------------------------------------------------------------------------------------------------------------------------------------------------------------------------------------------------------------------------|-----------------------------------------------------------------------------------------------|-------------------------------------|
| MAPK<br>(A group)                                | <b>CbMAPK3</b>    | AY805424   | AtMPK3, NtWIPK, CaMPK1, PsMAPK3,<br>MsMMK4, Petroselinum crispum<br>PARSLEY MAPK | NaCl <sup>U</sup> , cold stress <sup>U</sup>                                                                                                                                                                              | -                                                                                             | Zhang et al., 2006                  |
| <b><i>Curcuma longa L. (turmeric)</i></b>        |                   |            |                                                                                  |                                                                                                                                                                                                                           |                                                                                               |                                     |
| MAPK<br>(A group)                                | <b>CIMPK6</b>     | KP782042   | AtMPK6, ZmMPK6, BnMPK6, OsMPK6                                                   | MeJA <sup>U</sup> , SA <sup>U</sup> , GA <sup>U</sup>                                                                                                                                                                     | -                                                                                             | Nanda et al., 2016                  |
| <b><i>Gossypium hirsutum (upland cotton)</i></b> |                   |            |                                                                                  |                                                                                                                                                                                                                           |                                                                                               |                                     |
| MAPKKK<br>(Raf-like)                             | <b>GhMAPKKK49</b> | KP057883   | SIMAPKKK24, ZmMAPKKK57, AtRaf41,<br>BnaRaf41                                     | drought <sup>U</sup> and wounding stress <sup>U</sup> ,<br>H <sub>2</sub> O <sub>2</sub> <sup>U</sup> , GA <sup>U</sup> , MeJA <sup>U</sup> , SA <sup>U</sup> , 6-BA <sup>U</sup> ,<br>NAA <sup>U</sup> , ET <sup>U</sup> | GhMAPKK4,<br>GhMAPKK9                                                                         | Liu et al., 2016                    |
| MAPKK<br>(A group)                               | <b>GhMCK2_2</b>   | FJ966886.1 | AtMCK2                                                                           | SA <sup>U</sup> , JA <sup>U</sup> , H <sub>2</sub> O <sub>2</sub> <sup>U</sup> , wounding stress <sup>U</sup>                                                                                                             | GhMPK3,<br>GhMPK6,<br>GhMPK18,<br>GhMPK12,<br>GhMPK14<br>GhMPK19,<br>GhMPK23,<br>GhMPK27      | Zhang et al., 2016                  |
| MAPKK<br>(C group)                               | <b>GhMCK4</b>     | -          | AtMCK4                                                                           | SA <sup>U</sup> , wounding stress <sup>U</sup>                                                                                                                                                                            | GhMPK8,<br>GhMPK16,<br>GhMPK20                                                                | Li et al., 2014, Zhang et al., 2016 |
| MAPKK<br>(C group)                               | <b>GhMCK5</b>     | HQ637469.1 | AtMCK5                                                                           | SA <sup>U</sup> , H <sub>2</sub> O <sub>2</sub> <sup>U</sup> , wounding stress <sup>U</sup>                                                                                                                               | GhMPK3,<br>GhMPK6,<br>GhMPK12,<br>GhMPK13,<br>GhMPK27                                         | Zhang et al., 2016                  |
| MAPKK<br>(A group)                               | <b>GhMCK6</b>     | GU188977.1 | AtMCK6                                                                           | SA <sup>U</sup> , JA <sup>U</sup> , H <sub>2</sub> O <sub>2</sub> <sup>U</sup> , PEG <sup>U</sup> , drought <sup>U</sup> ,<br>heat <sup>U</sup> , wounding <sup>U</sup> , and cold<br>stress <sup>U</sup>                 | GhMPK3,<br>GhMPK6,<br>GhMPK16<br>GhMPK18,                                                     | Zhang et al., 2016                  |
| MAPKK<br>(D group)                               | <b>GhMCK7</b>     | -          | AtMCK7                                                                           | SA <sup>U</sup> , JA <sup>U</sup> , H <sub>2</sub> O <sub>2</sub> <sup>U</sup> , drought <sup>U</sup> , heat <sup>U</sup> ,<br>wounding <sup>U</sup> and cold stress <sup>U</sup>                                         | GhMPK8,<br>GhMPK14,<br>GhMPK16,<br>GhMPK25                                                    | Zhang et al., 2016                  |
| MAPKK<br>(D group)                               | <b>GhMCK10_1</b>  | -          | AtMCK10                                                                          | SA <sup>U</sup> , JA <sup>U</sup> , H <sub>2</sub> O <sub>2</sub> <sup>U</sup> , cold <sup>U</sup> and<br>wounding stress <sup>U</sup>                                                                                    | 17 of the 21 MAPK<br>genes (no<br>interaction:<br>GhMPK5,<br>GhMPK10,<br>GhMPK14,<br>GhMPK25) | Zhang et al., 2016                  |
| MAPKK                                            | <b>GhMPK11</b>    | KP901089   | TcMPK4, AtMPK11 and AtMPK4,                                                      | GA <sub>3</sub> <sup>U</sup> , pathogens ( <i>R. Solanacearum</i> ,                                                                                                                                                       | -                                                                                             | Wang et al., 2016,                  |

|                                              |                 |            |                                                                 |                                                                                                                                                     |        |                     |
|----------------------------------------------|-----------------|------------|-----------------------------------------------------------------|-----------------------------------------------------------------------------------------------------------------------------------------------------|--------|---------------------|
| (D group)                                    |                 |            | NaMPK4                                                          | <i>R. solani</i> ) <sup>U</sup>                                                                                                                     |        | Zhang et al., 2016  |
| MAPKK<br>(D group)                           | <b>GhMPK17</b>  | KJ192192   | AtMPK17, ZmMPK17, OsMPK17-2                                     | PEG <sup>U</sup> and cold stress <sup>U</sup>                                                                                                       | -      | Zhang et al., 2014b |
| <b><i>Ipomoea batatas</i> (sweet potato)</b> |                 |            |                                                                 |                                                                                                                                                     |        |                     |
| MAPK<br>(A group)                            | <b>IbMPK3</b>   | KT934378   | NtWIPK 22, CaMPK1, PsMAPK3,<br>AtMPK3, MsMMK4                   | NaCl <sup>U</sup> , H <sub>2</sub> O <sub>2</sub> <sup>U</sup> , cold stress <sup>U</sup> ,<br>SA <sup>U</sup> , JA <sup>U</sup>                    | -      | Kim et al., 2016    |
| MAPK<br>(A group)                            | <b>IbMPK6</b>   | KT934379   | NtSIPK, CaMAPK2, MsMMK1, AtMPK6,<br>PsMAPK                      | salinity stress <sup>U</sup> , H <sub>2</sub> O <sub>2</sub> <sup>U</sup> , SA <sup>U</sup> , JA <sup>U</sup>                                       | -      | Kim et al., 2016    |
| <b><i>Malus domestica</i> (apple)</b>        |                 |            |                                                                 |                                                                                                                                                     |        |                     |
| MAPK<br>(A group)                            | <b>MdMPK1</b>   | GU139791.1 | PcMKK2, NtSIPK, LeMEK1, AtMCK2                                  | -                                                                                                                                                   | MdMCK1 | Wang et al., 2010b  |
| <b><i>Musa acuminata</i> L. (banana)</b>     |                 |            |                                                                 |                                                                                                                                                     |        |                     |
| MAPK<br>(D group)                            | <b>MaMAPK2</b>  | KF582546   | AtMPK20                                                         | ETH <sup>U</sup> , MeJA <sup>U</sup> , SA <sup>U</sup> , pathogenic<br>fungus( <i>Fusarium Oxysporum</i> f.<br>Sp) <sup>U</sup>                     | -      | Wang et al., 2015b  |
| MAPK<br>(D group)                            | <b>MaMAPK3</b>  | KF594427   | AtMPK9, AtMPK17, OsMPK12,<br>OsMPK13                            | ETH <sup>U</sup> , MeJA <sup>U</sup> , SA <sup>U</sup> , pathogenic<br>fungus( <i>Fusarium Oxysporum</i> f.<br>Sp) <sup>U</sup>                     | -      | Wang et al., 2015b  |
| MAPK<br>(B group)                            | <b>MaMAPK4</b>  | KF594427   | OsMPK2, AtMPK4, AtMPK11                                         | ABA <sup>U</sup> , ETH <sup>U</sup> , MeJA <sup>U</sup> , SA <sup>U</sup>                                                                           | -      | Wang et al., 2015b  |
| MAPK<br>(D group)                            | <b>MaMAPK6</b>  | KF594427   | OsMPK11                                                         | ABA <sup>U</sup> , ETH <sup>U</sup> , MeJA <sup>U</sup> , SA <sup>U</sup> ,<br>pathogenic fungus<br>( <i>Fusarium Oxysporum</i> f. Sp) <sup>U</sup> | -      | Wang et al., 2015b  |
| <b><i>Manihot esculenta</i> (cassava)</b>    |                 |            |                                                                 |                                                                                                                                                     |        |                     |
| MAPK<br>(A group)                            | <b>MeMAPK1</b>  | -          | CsMPK6, MDMPK6-1, MDMPK6-2,<br>SiMAPK1, SiMAPK2, AtMPK6, OsMPK6 | PEG <sup>U</sup> , H <sub>2</sub> O <sub>2</sub> <sup>D</sup> , NaCl <sup>U</sup> , cold stress <sup>D</sup>                                        | -      | Yan et al., 2016    |
| MAPK<br>(B group)                            | <b>MeMAPK10</b> | -          | MdMPK4-4, CsMPK4-1                                              | PEG <sup>U</sup> , cold stress <sup>D</sup> , NaCl <sup>U</sup>                                                                                     | -      | Yan et al., 2016    |
| MAPK<br>(B group)                            | <b>MeMAPK17</b> | -          | CsMPK4-2, MdMPK4-1, MdMPK4-2,<br>SiMAPK5, SiMAPK6               | NaCl <sup>U</sup> , H <sub>2</sub> O <sub>2</sub> <sup>D</sup> , cold stress <sup>D</sup>                                                           | -      | Yan et al., 2016    |
| <b><i>Origanum onites</i> L. (Lamiaceae)</b> |                 |            |                                                                 |                                                                                                                                                     |        |                     |
| MAPKK<br>(A group)                           | <b>OoMAPKK1</b> | EF558371   | NtMEK1, LeMCK3, AtMCK6, OsMEK1,<br>OsMAPKK6, ZmMEK1             | cold <sup>U</sup> and wounding stress <sup>U</sup>                                                                                                  | -      | Poyraz, 2013        |
| <b><i>Oryza minuta</i></b>                   |                 |            |                                                                 |                                                                                                                                                     |        |                     |
| MAPKK                                        | <b>OmMCK1</b>   | DQ989217   | OsMCK1, OsMCK6 AtMCK1, AtMCK2 ,                                 | MeJA <sup>U</sup> , ETH <sup>U</sup> , SA <sup>U</sup> , MV <sup>U</sup>                                                                            | -      | You et al., 2007    |

|                                      |                                                                         |                 |                                                |                                                                                                                                                                                                                                                                                                                 |                |                                                                                                                                 |
|--------------------------------------|-------------------------------------------------------------------------|-----------------|------------------------------------------------|-----------------------------------------------------------------------------------------------------------------------------------------------------------------------------------------------------------------------------------------------------------------------------------------------------------------|----------------|---------------------------------------------------------------------------------------------------------------------------------|
| (A group)                            |                                                                         |                 | AtMKK6                                         |                                                                                                                                                                                                                                                                                                                 |                |                                                                                                                                 |
| <b>Oryza sativa</b>                  |                                                                         |                 |                                                |                                                                                                                                                                                                                                                                                                                 |                |                                                                                                                                 |
| MAPK<br>(A group)                    | <b>OsMPK1 (OsMPK6, OsMAPK6, OsSIPK)</b>                                 | AJ535841        | NtSIPK, AtMPK6, MsSIMK                         | JA <sup>U</sup> , SA <sup>U</sup> , ETH <sup>U</sup> , CHX <sup>U</sup> , JA/SA + CHX <sup>U</sup> , cantharidin <sup>U</sup> , okadaic acid <sup>U</sup> , H <sub>2</sub> O <sub>2</sub> <sup>U</sup> , chitosan <sup>U</sup> , NaCl <sup>U</sup> , cold stress <sup>U</sup>                                   | OsMKK4         | Lee et al., 2008b, Zhang et al., 2012b, Yoo et al., 2014                                                                        |
| MAPK<br>(C group)                    | <b>OsMPK4 (OsMAPK4, OsMPK7, OsMAPkinase2, OsMPK2, OsMSRMK3, OsMPK3)</b> | AJ512642        | OsMAPK3, AtMPK1                                | wounding <sup>U</sup> , JA <sup>U</sup> , SA <sup>U</sup> , ET <sup>U</sup> , H <sub>2</sub> O <sub>2</sub> <sup>U</sup> , protein phosphatase inhibitors <sup>U</sup> , chitosan <sup>U</sup> , high salt/sugar <sup>U</sup> , heavy metals <sup>U</sup>                                                       | -              | Agrawal et al., 2003a, Reyna et al., 2006                                                                                       |
| MAPK<br>(A group)                    | <b>OsMPK3 (OsMPK5, OsMAP1, OsMAPK2, OsMAPK5, OsMSRMK2, OsBIMK1)</b>     | AJ486975        | AtMPK3, ZmMAPK4, NtSIPK, NtWIPK,               | H <sub>2</sub> O <sub>2</sub> <sup>U</sup> , SA <sup>U</sup> , BTH <sup>U</sup> , dichloroisonicotinic acid <sup>U</sup> , probenazole <sup>U</sup> , JA and its methyl ester <sup>U</sup> , plant pathogenic bacteria ( <i>Pseudomonas syringae</i> pv. <i>Syringae</i> ) <sup>U</sup> , wounding <sup>U</sup> | OsMKK6         | Agrawal et al., 2002, Xiong and Yang, 2003, Zhang et al., 2012b, Jalmi and Sinha, 2016, Song and Goodman, 2002 Xie et al., 2014 |
| MAPK<br>(B group)                    | <b>OsMPK14 (OsMPK3, OsMAPK3, OsMAP3, OsMAPKK33)</b>                     | GQ265780        | AtMPK4, OsMPK6, AtMPK16                        | low temperature <sup>U</sup> , high salinity <sup>U</sup> , drought <sup>D</sup> , light in roots <sup>U</sup> , light in shoots <sup>D</sup>                                                                                                                                                                   | OsMKK3         | Liang et al., 2010, Lee et al., 2011, Wankhede et al. 2013                                                                      |
| MAPK<br>(D group)                    | <b>OsMPK17-1 (OsBWMK1, OsMPK12)</b>                                     | AF177392        | OsRMAPK2, AtMPK9                               | JA <sup>U</sup> , SA <sup>U</sup>                                                                                                                                                                                                                                                                               | -              | Agrawal et al., 2003b                                                                                                           |
| MAPK<br>(D group)                    | <b>OsMPK20-4 (OsWJUMK1, OsMPK8, OsMPKG1)</b>                            | AJ512643        | OsMAPK44, AtMPK20, AtMPK18                     | H <sub>2</sub> O <sub>2</sub> <sup>U</sup> , heavy metals <sup>U</sup> , cold stress                                                                                                                                                                                                                            | OsMKK6, OsMPK3 | Agrawal et al., 2003a, Sheikh et al., 2012                                                                                      |
| MAPK<br>(D group)                    | <b>OsMPK7 (OsMAPK44)</b>                                                | AY506572        | OsMPK20-4, AtMPK20                             | NaCl <sup>U</sup> , drought <sup>U</sup> , H <sub>2</sub> O <sub>2</sub> <sup>U</sup> , bacterial pathovar ( <i>X. oryzae</i> ) <sup>U</sup>                                                                                                                                                                    | OsMKK3         | Jeong et al., 2006, Zhang et al., 2014e, Jalmi and Sinha, 2016                                                                  |
| MAPKKK<br>(Raf-like)                 | <b>OsEDR1 (OsMAPKKK1)</b>                                               | AY167575        | AtEDR1, HvEDR1                                 | wounding <sup>U</sup> , JA <sup>U</sup> , SA <sup>U</sup> , ET <sup>U</sup> , H <sub>2</sub> O <sub>2</sub> <sup>U</sup>                                                                                                                                                                                        | -              | Kim et al., 2003                                                                                                                |
| MAPKKK<br>(Raf-like)                 | <b>OsDSM1(OsMAPKKK6)</b>                                                | LOC_Os02g50970  | AtEDR1, AtCTR1                                 | NaCl <sup>U</sup> , drought <sup>U</sup>                                                                                                                                                                                                                                                                        | -              | Ning et al., 2010                                                                                                               |
| <b>Reaumuria soongorica</b>          |                                                                         |                 |                                                |                                                                                                                                                                                                                                                                                                                 |                |                                                                                                                                 |
| MAPK<br>(C group)                    | <b>RsMPK2</b>                                                           | <i>EU846599</i> | <i>PsMPK2</i> , NtNTF3, <i>PsMPK2</i> , PhMEK1 | H <sub>2</sub> O <sub>2</sub> <sup>U</sup> , PEG <sup>U</sup>                                                                                                                                                                                                                                                   | -              | Liu et al., 2010                                                                                                                |
| <b>Solanum lycopersicum (tomato)</b> |                                                                         |                 |                                                |                                                                                                                                                                                                                                                                                                                 |                |                                                                                                                                 |
| MAPK                                 | <b>SIMAPK3</b>                                                          | -               | -                                              | H <sub>2</sub> O <sub>2</sub> <sup>U</sup> , MeJA <sup>U</sup> , SA <sup>U</sup>                                                                                                                                                                                                                                | -              | Li et al., 2017d                                                                                                                |
| <b>Solanum tuberosum (potato)</b>    |                                                                         |                 |                                                |                                                                                                                                                                                                                                                                                                                 |                |                                                                                                                                 |

|                                                                                    |                          |                                                       |                                                      |                                                                                                                                                                                                                                                                                                 |         |                                                                                                            |
|------------------------------------------------------------------------------------|--------------------------|-------------------------------------------------------|------------------------------------------------------|-------------------------------------------------------------------------------------------------------------------------------------------------------------------------------------------------------------------------------------------------------------------------------------------------|---------|------------------------------------------------------------------------------------------------------------|
| MAPK<br>(A group)                                                                  | <b>StMPK1</b>            | -<br>(98% identical to an EST<br>sequence ( AB062138) | <i>LeMPK1</i> , <i>SIPK</i> , AtMPK6, OsMPK6         | JA <sup>U</sup> , wounding <sup>U</sup> , pathogenic fungus<br>( <i>Fusarium Oxysporum</i> f. Sp) <sup>U</sup> and<br>heat stress <sup>U</sup>                                                                                                                                                  | -       | Blanco et al., 2006                                                                                        |
| <b>Zea mays (maize)</b>                                                            |                          |                                                       |                                                      |                                                                                                                                                                                                                                                                                                 |         |                                                                                                            |
| MAPKK<br>(A group)                                                                 | <b>ZmMKK1</b>            | AB062138.1                                            | OsMKK1, AtMKK1, NtMEK1                               | NaCl <sup>U</sup> , ETH <sup>U</sup> , PEG <sup>U</sup> , H <sub>2</sub> O <sub>2</sub> <sup>U</sup> , 4°C <sup>U</sup>                                                                                                                                                                         | ZmMEKK1 | Cai et al., 2014                                                                                           |
| MAPKK<br>(B group)                                                                 | <b>ZmMKK3</b>            | JN972438                                              | OsMKK3, AtMKK3                                       | H <sub>2</sub> O <sub>2</sub> <sup>U</sup> , PEG <sup>U</sup>                                                                                                                                                                                                                                   | -       | Zhang et al., 2012d                                                                                        |
| MAPK<br>(A group)                                                                  | <b>ZmMPK6-2 (ZmMPK5)</b> | AB016802                                              | AtMPK6, OsMPK1                                       | BR <sup>U</sup> , SA <sup>U</sup> , ETH <sup>U</sup> , H <sub>2</sub> O <sub>2</sub> <sup>U</sup> , CdCl <sub>2</sub> <sup>U</sup> ,<br>UV <sup>U</sup> , light <sup>U</sup> , hexavalent chromium<br>(VI) <sup>U</sup> , cold <sup>U</sup> , NaCl <sup>U</sup> wounding<br>stress <sup>U</sup> | -       | Zhang et al. 2006, 2007, 2010; Lin<br>et al., 2009; Ding et al. 2013; Sun<br>et al., 2015; Ma et al., 2016 |
| MAPK<br>(D group)                                                                  | <b>ZmMPK6</b>            | NM_001111768                                          | OsMPK15, OsMPK16-1, TaMPK2,<br>GhMPK16, AtMPK16      | SA <sup>U</sup> , H <sub>2</sub> O <sub>2</sub> <sup>U</sup> , PEG <sup>U</sup> , NaCl <sup>U</sup>                                                                                                                                                                                             | -       | Sun et al., 2015                                                                                           |
| MAPK<br>(C group)                                                                  | <b>ZmMPK7</b>            | EU616650                                              | OsMSRMK, AtMPK17                                     | H <sub>2</sub> O <sub>2</sub> <sup>U</sup>                                                                                                                                                                                                                                                      | -       | Zong et al., 2009                                                                                          |
| MAPK<br>(C group)                                                                  | <b>ZmMPK8</b>            | -                                                     | OsMPK16, OsMPK17, AtMPK8,<br>AtMPK15                 | drought stress <sup>U</sup>                                                                                                                                                                                                                                                                     | -       | Sun et al., 2015                                                                                           |
| <b>DOWN-REGULATED GENES</b><br><i>Brachypodium distachyon</i> (purple false brome) |                          |                                                       |                                                      |                                                                                                                                                                                                                                                                                                 |         |                                                                                                            |
| MAPKK<br>(A group)                                                                 | <b>BdMKK6.2</b>          | JX297555                                              | OsMPK6, AtMPK6, AtMPK10                              | H <sub>2</sub> O <sub>2</sub> <sup>U</sup> , cold <sup>U</sup> , heat <sup>U</sup> and PEG <sup>D</sup>                                                                                                                                                                                         | -       | Chen et al., 2012;<br>Sun et al., 2016                                                                     |
| <b>Cucumis sativus L. (cucumber)</b>                                               |                          |                                                       |                                                      |                                                                                                                                                                                                                                                                                                 |         |                                                                                                            |
| MAPK<br>(A group)                                                                  | <b>CsNMAPK</b>           | DQ812086                                              | GmMAPK1, PsMAPK3, MsMAPK,<br>StWIPK, LeMAPK, CaMAPK1 | H <sub>2</sub> O <sub>2</sub> <sup>U</sup> , SA <sup>U</sup> and cold stress <sup>D</sup>                                                                                                                                                                                                       | -       | Xu et al., 2008b                                                                                           |
| <b>Malus domestica (apple)</b>                                                     |                          |                                                       |                                                      |                                                                                                                                                                                                                                                                                                 |         |                                                                                                            |
| MAPK<br>(A group)                                                                  | <b>MdMKK1</b>            | GU139793                                              | PcMKK2, NtSIPKK, LeMEK1, AtMKK2                      | -                                                                                                                                                                                                                                                                                               | MdMPK1  | Wang et al., 2010a                                                                                         |
| <b>Manihot esculenta (cassava)</b>                                                 |                          |                                                       |                                                      |                                                                                                                                                                                                                                                                                                 |         |                                                                                                            |
| MAPK<br>(C group)                                                                  | <b>MeMAPK4</b>           | -                                                     | CsMPK1, SIMAPK9                                      | osmotic <sup>D</sup> , H <sub>2</sub> O <sub>2</sub> <sup>D</sup> , NaCl <sup>U</sup> , cold<br>stress <sup>D</sup>                                                                                                                                                                             | -       | Yan et al., 2016                                                                                           |
| MAPK<br>(D group)                                                                  | <b>MeMAPK19</b>          | -                                                     | CsMPK9-2                                             | osmotic <sup>D</sup> , H <sub>2</sub> O <sub>2</sub> <sup>D</sup> , cold <sup>D</sup> and NaCl <sup>U</sup>                                                                                                                                                                                     | -       | Yan et al., 2016                                                                                           |
| <b>Musa acuminata L. (banana)</b>                                                  |                          |                                                       |                                                      |                                                                                                                                                                                                                                                                                                 |         |                                                                                                            |

|                                 |                |                 |                                                                              |                                                                                                                           |   |                      |
|---------------------------------|----------------|-----------------|------------------------------------------------------------------------------|---------------------------------------------------------------------------------------------------------------------------|---|----------------------|
| MAPK<br>(D group)               | <b>MaMAPK1</b> | <i>KF582545</i> | AtMPK20                                                                      | ETH <sup>u</sup> , MeJA <sup>u</sup> , SA <sup>u</sup> , pathogenic fungus( <i>Fusarium Oxysporum</i> f. Sp) <sup>u</sup> | - | Wang et al., 2015b   |
| <b><i>Rheum australe D.</i></b> |                |                 |                                                                              |                                                                                                                           |   |                      |
| MAPK<br>(A group)               | <b>RaMPK1</b>  | <i>DQ078119</i> | GmMPK2, PcMPK6, NTF4-2, StMPK, MsMMK1, LeMPK2, NtSIPK, NbSIPK, AtMPK, OsMPK6 | SA <sup>D</sup> , JA <sup>u</sup>                                                                                         | - | Ghawana et al., 2010 |
| <b><i>Zea mays (maize)</i></b>  |                |                 |                                                                              |                                                                                                                           |   |                      |
| MAPKK<br>(group C)              | <b>ZmMCK4</b>  | <i>EU954741</i> | <i>MsSIMKK, AtMCK5, AtMCK4, NtMEK2</i>                                       | H <sub>2</sub> O <sub>2</sub> <sup>u</sup> , cold(4°C) <sup>u</sup> PEG, NaCl <sup>u</sup>                                | - | Kong et al., 2011    |
| MAPK<br>(group B)               | <b>ZmSIMK1</b> | AY433815        | AtMPK4, AtMPK11                                                              | NaCl <sup>u</sup> , SA <sup>u</sup> , H <sub>2</sub> O <sub>2</sub> , drought stress <sup>u</sup>                         | - | Gu et al., 2010      |

\*Brassica Database (BRAD) <http://brassicadb.org/brad>
